# Supplementary material
Source: bioRxiv or medRxiv preprint supplement (https://www.biorxiv.org/highwire/filestream/82058/field_highwire_adjunct_files/11/267443-8.pdf)
Supplement: Supplementary file [file 267443-8.pdf]

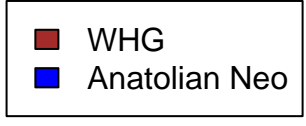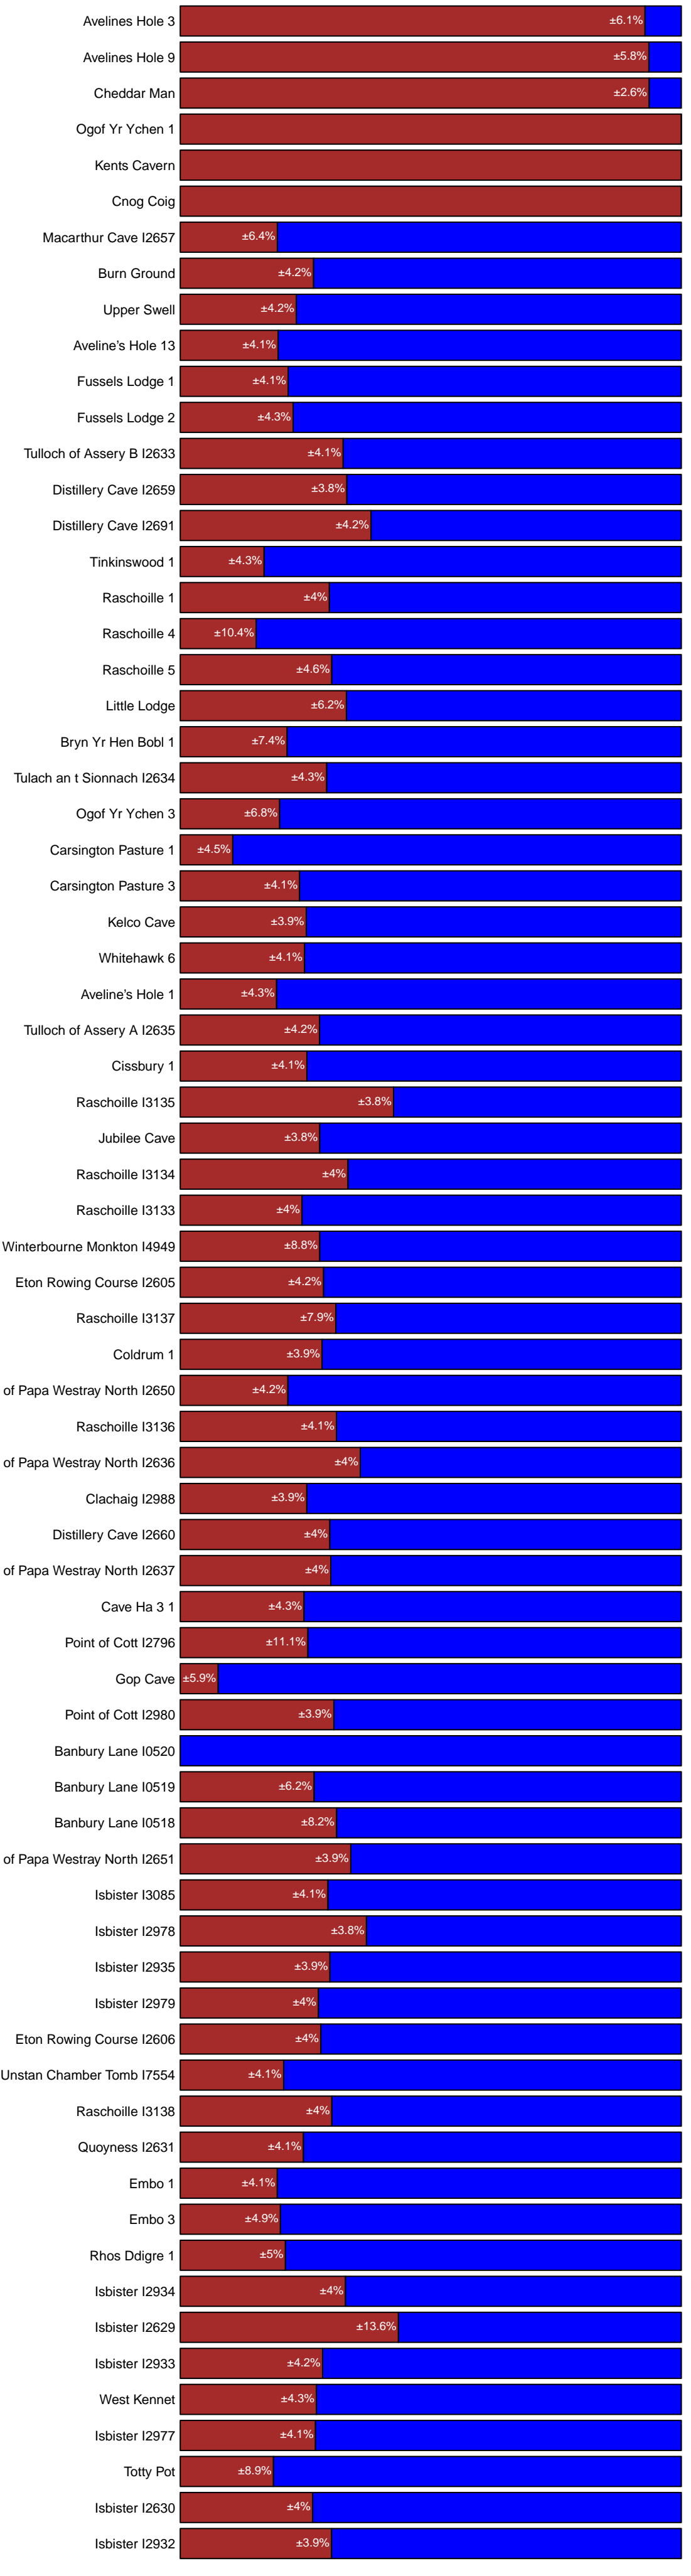

0.0 0.2 0.4 0.6 0.8 1.0

admixture coefficient
